# Supplementary material
Source: publisher site journal article supplement (https://www.dovepress.com/article/366826)
Supplement: Supplementary file 1 [file get_supplementary_file.php]

**Supplementary materials**

a)

| <b>Primer A</b> |        |                                                               |           |           |  |
|-----------------|--------|---------------------------------------------------------------|-----------|-----------|--|
| Score           | Expect | Identities                                                    | Gaps      | Strand    |  |
| 1203 bits(651)  | 0.0    | 662/667(99%)                                                  | 2/667(0%) | Plus/Plus |  |
| Query           | 4      | ATGGGGATTGTTAGGGACTGGGGGAGAGGAATGGGGAGTTGGCGTCTAGTGGGGACAGAG  | 63        |           |  |
| Sbjct           | 94     | ATGGGGATTGTTAGGGACTGGGGGAGAGGAATGGGGAGTTGGCGTCTAGTGGGGACAGAG  | 153       |           |  |
| Query           | 64     | GTTCCATTTTGC GTTCATCTGGAGGTGGACGCACAGCATCGGGAATACACAATGCCACTG | 123       |           |  |
| Sbjct           | 154    | GTTCCATTTTGC GTTCATCTGGAGGTGGACGCACAGCATCGGGAATACACAATGCCACTG | 213       |           |  |
| Query           | 124    | AATTGTGTACTTCAACATGGTCACAATGGCACAATCCTTTATTTTTGTAGAGACAGGGTG  | 183       |           |  |
| Sbjct           | 214    | AATTGTGTACTTCAACATGGTCACAATGGCACAATCCTTTATTTTTGTAGAGACAGGGTG  | 273       |           |  |
| Query           | 184    | TCACTGTGTTGCCAGGCTAGCCTCGAAGCTCGGGTTCAGGCTCTCCTTCCACCTCGGCCCT | 243       |           |  |
| Sbjct           | 274    | TCACTGTGTTGCCAGGCTAGCCTCGAAGCTCGGGTTCAGGCTCTCCTTCCACCTCGGCCCT | 333       |           |  |
| Query           | 244    | CCCAAAGTGCTGGGATTATAGGTGTGAGCCACCACACCTGGCCAAATTTGTGGGTTTTTT  | 303       |           |  |
| Sbjct           | 334    | CCCAAAGTGCTGGGATTATAGGTGTGAGCCACCACACCTGGCCAAATTTGTGGGTTTTTT  | 393       |           |  |
| Query           | 304    | ggTTTTTatgTTTTGAAACAGAGTTTCTCCCTTGTCACCTAGGCTGGAGTACAGTGGCG   | 363       |           |  |
| Sbjct           | 394    | GGTTTTTATGTTTTGAAACAGAGTTTCTCCCTTGTCACCTAGGCTGGAGTACAGTGGCG   | 453       |           |  |
| Query           | 364    | CGATCTTGGCTCACTGCAACCTTTACCTCCTGGGTTCAAGCGATTCTCCTGCCTCAGCCT  | 423       |           |  |
| Sbjct           | 454    | CGATCTTGGCTCACTGCAACCTTTACCTCCTGGGTTCAAGCGATTCTCCTGCCTCAGCCT  | 513       |           |  |
| Query           | 424    | CCCAAGTAGCTGGGATTACAGGCACCTGCCAACACACCCAGCTAATTTTTTCTATTTTTA  | 483       |           |  |
| Sbjct           | 514    | CCCAAGTAGCTGGGATTACAGGCACCTGCCAACACACCCAGCTAATTTTTTCTATTTTTA  | 573       |           |  |
| Query           | 484    | GTAGAGACGGGGTTTACCATGTTGGCCAGGCTGGTCTCGAACTCCTGACCTCAGGTGAT   | 543       |           |  |
| Sbjct           | 574    | GTAGAGACGGGGTTTACCATGTTGGCCAGGCTGGTCTCGAACTCCTGACCTCAGGTGAT   | 633       |           |  |
| Query           | 544    | CCGCCCACCTCAGCCTCCCAAAGTGCTGGGATTACAGGAGTGAGGCGCTGCGCCAGCCA   | 603       |           |  |
| Sbjct           | 634    | CCGCCCACCTCAGCCTCCCAAAGTGCTGGGATTACAGGAGTGAGGCGCTGCGCCAGCCA   | 693       |           |  |
| Query           | 604    | AAATTTGTGTTTTTAAATGTATGTTTAAACAATTTAAAAATCCTAGATCTCCCCACAGTT  | 663       |           |  |
| Sbjct           | 694    | AAATTTGTGTTTTTAAATGTATGTTTAAACAATTTAAAAATCCTAGATCAT--CCACAGTT | 751       |           |  |
| Query           | 664    | TGCCAAA 670                                                   |           |           |  |
| Sbjct           | 752    | TGCCAAA 758                                                   |           |           |  |

Deletion Mutation ↓

Insertion Mutation ↓

Substitution Mutation ↓

b)

| <b>Primer B</b> |        |                                                               |           |           |  |
|-----------------|--------|---------------------------------------------------------------|-----------|-----------|--|
| Score           | Expect | Identities                                                    | Gaps      | Strand    |  |
| 894 bits(484)   | 0.0    | 494/498(99%)                                                  | 3/498(0%) | Plus/Plus |  |
| Query           | 22     | CTGCTCT-G-AGAGCTCATGTTCCAGCAGGGACAGCTAACACCCAGGGGCTGCACGGGG   | 79        |           |  |
| Sbjct           | 46     | CTGCTCTAGAAGAGCTCATGTTCCAGCAGGGACAGCTAACACCCAGGGGCTGCACGGGG   | 105       |           |  |
| Query           | 80     | TGGAGGGCTCTTCAGAGGCAGGATCACCTCGGAGATGGGTGCAGGGGACCTCGGGCCACC  | 139       |           |  |
| Sbjct           | 106    | TGGAGGGCTCTTCAGAGGCAGGATCACCTCGGAGATGGGTGCAGGGGACCTCGGGCCACC  | 165       |           |  |
| Query           | 140    | CCAGGGCCAGGCCTGCTTGCCTGCTTAGGAGCTGGGTCTCCCACTCAGGGAGGGAGGGG   | 199       |           |  |
| Sbjct           | 166    | CCAGGGCCAGGCCTGCTTGCCTGCTTAGGAGCTGGGTCTCCCACTCAGGGAGGGAGGGG   | 225       |           |  |
| Query           | 200    | TCATGTCTCAAGGGCAGCCACTGGGCCTGAAAAGCAGAACC GCATGTGATCAGTCTGGGT | 259       |           |  |
| Sbjct           | 226    | TCATGTCTCAAGGGCAGCCACTGGGCCTGAAAAGCAGAACC GCATGTGATCAGTCTGGGT | 285       |           |  |
| Query           | 260    | GGGCAAGACTTCAAGAGAGCACGCCTACCCTCAAGGGATGGAAGCAGAGGCTGGTAGCCG  | 319       |           |  |
| Sbjct           | 286    | GGGCAAGACTTCAAGAGAGCACGCCTACCCTCAAGGGATGGAAGCAGAGGCTGGTAGCCG  | 345       |           |  |
| Query           | 320    | ACGTCCATGCCAGCCACCAACTCAGAGCCAGCACACTACCCGCATGTGCCTCTGCCAATG  | 379       |           |  |
| Sbjct           | 346    | ACGTCCATGCCAGCCACCAACTCAGAGCCAGCACACTACCCGCATGTGCCTCTGCCAATG  | 405       |           |  |
| Query           | 380    | AGTGGATGAAAAGCAGCGACCTACAGATGCAGGCAACCTGGATGAGTCTTGACTTTATCT  | 439       |           |  |
| Sbjct           | 406    | AGTGGATGAAAAGCAGCGACCTACAGATGCAGGCAACCTGGATGAGTCTTGACTTTATCT  | 465       |           |  |
| Query           | 440    | CACGGAGGGAAGGAAGCAGGCTCGGGAGGTGCCGTGCCGCTGGCTCTGTTTATAAGCTG   | 499       |           |  |
| Sbjct           | 466    | CACGGAGGGAAGGAAGCAGGCTCGGGAGGTGCCGTGCCGCTGGCTCTGTTTATAAGCTG   | 525       |           |  |
| Query           | 500    | TCTGGaaaaaggcaaaa                                             | 517       |           |  |
| Sbjct           | 526    | TCTGGGAAAA-GGCAAAA                                            | 542       |           |  |

Deletion Mutation ↓

Insertion Mutation ↓

Substitution Mutation ↓

Figure S1: DNA sequencing for autistic sample-2, a) Primer A and b) Primer B

a)

| <b>Primer A</b> |        |                                                               |           |           |     |
|-----------------|--------|---------------------------------------------------------------|-----------|-----------|-----|
| Score           | Expect | Identities                                                    | Gaps      | Strand    |     |
| 1192 bits(645)  | 0.0    | 662/669(99%)                                                  | 5/669(0%) | Plus/Plus |     |
| Query           | 7      | ATGGGGATTGTTAGGGACTGGGGGAGAGGAATGGGGAGTTGGCGTCTAGTGGGGACAGAG  |           |           | 66  |
| Sbjct           | 94     | ATGGGGATTGTTAGGGACTGGGGGAGAGGAATGGGGAGTTGGCGTCTAGTGGGGACAGAG  |           |           | 153 |
| Query           | 67     | GTTCCATTTTGCCTTCATCTGGAGGTGGACGCACAGCATCGGGAATACACTTAATGCCAC  |           |           | 126 |
| Sbjct           | 154    | GTTCCATTTTGCCTTCATCTGGAGGTGGACGCACAGCATCGGGAATACAC--AATGCCAC  |           |           | 211 |
| Query           | 127    | TGAATTGTGTACTTCAACATGGTCACAATGGCACATTCTTTATTTTTTTGTAGAGACAGGG |           |           | 186 |
| Sbjct           | 212    | TGAATTGTGTACTTCAACATGGTCACAATGGCACATTCTTTATTTTTTTGTAGAGACAGGG |           |           | 271 |
| Query           | 187    | TGTCACTGTGTTGCCAGGCTAGCCTCGAACTCGGGTTCAGGCTCTCCTTCCACCTCGGC   |           |           | 246 |
| Sbjct           | 272    | TGTCACTGTGTTGCCAGGCTAGCCTCGAACTCGGGTTCAGGCTCTCCTTCCACCTCGGC   |           |           | 331 |
| Query           | 247    | CTCCCAAAGTGCTGGGATTATAGGTGTGAGCCACCACACCTGGCCAAATTTGTGGGtttt  |           |           | 306 |
| Sbjct           | 332    | CTCCCAAAGTGCTGGGATTATAGGTGTGAGCCACCACACCTGGCCAAATTTGTGGGTTTT  |           |           | 391 |
| Query           | 307    | ttggTTTTTatgTTTTGAAACAGAGTTTCTCCCTTGTACCTAGGCTGGAGTACAGTGG    |           |           | 366 |
| Sbjct           | 392    | TTGGTTTTTATGTTTTGAAACAGAGTTTCTCCCTTGTACCTAGGCTGGAGTACAGTGG    |           |           | 451 |
| Query           | 367    | CGCGATCTTGGCTCACTGCAACCTTTACCTCCTGGGTTCAAGCGATTCTCCTGCCTCAGC  |           |           | 426 |
| Sbjct           | 452    | CGCGATCTTGGCTCACTGCAACCTTTACCTCCTGGGTTCAAGCGATTCTCCTGCCTCAGC  |           |           | 511 |
| Query           | 427    | CTCCCAAGTAGCTGGGATTACAGGCACCTGCCAACACACCCAGCTAATTTTTTCTATTTT  |           |           | 486 |
| Sbjct           | 512    | CTCCCAAGTAGCTGGGATTACAGGCACCTGCCAACACACCCAGCTAATTTTTTCTATTTT  |           |           | 571 |
| Query           | 487    | TAGTAGAGACGGGGTTTACCATGTTGGCCAGGCTGGTCTCGAACTCCTGACCTCAGGTG   |           |           | 546 |
| Sbjct           | 572    | TAGTAGAGACGGGGTTTACCATGTTGGCCAGGCTGGTCTCGAACTCCTGACCTCAGGTG   |           |           | 631 |
| Query           | 547    | ATCCGCCCACCTCAGCCTCCCAAAGTGCTGGGATTACAGGAGTGAGGCGCTGCGCCAGC   |           |           | 606 |
| Sbjct           | 632    | ATCCGCCCACCTCAGCCTCCCAAAGTGCTGGGATTACAGGAGTGAGGCGCTGCGCCAGC   |           |           | 691 |
| Query           | 607    | CAAAATTTGTGTTTTTAAATGTATGTTAACAATTTAAAAATCCTAGATCACGCCACCGG   |           |           | 666 |
| Sbjct           | 692    | CAAAATTTGTGTTTTTAAATGTATGTTAACAATTTAAAAATCCTAGATCAT-CCACAG-   |           |           | 749 |
| Query           | 667    | TATTGCAAA 675                                                 |           |           |     |
| Sbjct           | 750    | T-TTGCAAA 757                                                 |           |           |     |

Deletion Mutation ▼

Insertion Mutation ▲

Substitution Mutation ▼

b)

| Primer B      |        |                                                               |           |           |  |
|---------------|--------|---------------------------------------------------------------|-----------|-----------|--|
| Score         | Expect | Identities                                                    | Gaps      | Strand    |  |
| 902 bits(488) | 0.0    | 495/498(99%)                                                  | 1/498(0%) | Plus/Plus |  |
| Query         | 3      | CCTGCTCTAG-AGAGCTCATGTTCCAGCAGGGACAGCTGACACCCAGGGGCCTGCACGGG  |           | 61        |  |
| Sbjct         | 45     | CCTGCTCTAGAAGAGCTCATGTTCCAGCAGGGACAGCTAACACCCAGGGGCCTGCACGGG  |           | 104       |  |
| Query         | 62     | GTGGAGGGCTCTTCAGAGGCAGGATCACCTCGGAGATGGGTGCAGGGGACCTCGGGCCAC  |           | 121       |  |
| Sbjct         | 105    | GTGGAGGGCTCTTCAGAGGCAGGATCACCTCGGAGATGGGTGCAGGGGACCTCGGGCCAC  |           | 164       |  |
| Query         | 122    | CCCAGGGCCAGGCTGCTTGCCCTGCTTAGGAGCTGGGTCTCCCACTCAGGGAGGGAGGG   |           | 181       |  |
| Sbjct         | 165    | CCCAGGGCCAGGCTGCTTGCCCTGCTTAGGAGCTGGGTCTCCCACTCAGGGAGGGAGGG   |           | 224       |  |
| Query         | 182    | GTCATGTCTCAAGGGCAGCCACTGGGCCTGAAAAGCAGAACC GCATGTGATCAGTCTGGG |           | 241       |  |
| Sbjct         | 225    | GTCATGTCTCAAGGGCAGCCACTGGGCCTGAAAAGCAGAACC GCATGTGATCAGTCTGGG |           | 284       |  |
| Query         | 242    | TGGGCAAGACTTCAAGAGAGCACGCCTACCCTCAAGGGATGGAAGCAGAGGCTGGTAGCC  |           | 301       |  |
| Sbjct         | 285    | TGGGCAAGACTTCAAGAGAGCACGCCTACCCTCAAGGGATGGAAGCAGAGGCTGGTAGCC  |           | 344       |  |
| Query         | 302    | GACGTCCATGCCAGCCACCAACTCAGAGCCAGCACACTACCCGCATGTGCCTCTGCCAAT  |           | 361       |  |
| Sbjct         | 345    | GACGTCCATGCCAGCCACCAACTCAGAGCCAGCACACTACCCGCATGTGCCTCTGCCAAT  |           | 404       |  |
| Query         | 362    | GAGTGGATGAAAAGCAGCGACCTACAGATGCAGGCAACCTGGATGAGTCTTGACTTTATC  |           | 421       |  |
| Sbjct         | 405    | GAGTGGATGAAAAGCAGCGACCTACAGATGCAGGCAACCTGGATGAGTCTTGACTTTATC  |           | 464       |  |
| Query         | 422    | TCACGGAGGGAAGGAAGCAGGCTCGGGAGGTGCCGTGCCGCTGGCTCTGTTTATAAGCT   |           | 481       |  |
| Sbjct         | 465    | TCACGGAGGGAAGGAAGCAGGCTCGGGAGGTGCCGTGCCGCTGGCTCTGTTTATAAGCT   |           | 524       |  |
| Query         | 482    | GTCTGGAAAAAGGCAAAA                                            |           | 499       |  |
| Sbjct         | 525    | GTCTGGGAAAAAGGCAAAA                                           |           | 542       |  |

Deletion Mutation ↓

Insertion Mutation ↓

Substitution Mutation ↓

Figure S2: DNA sequencing for autistic sample-4, a) Primer A and b) Primer B

a)

| Primer A      |        |                                                                |            |           |     |
|---------------|--------|----------------------------------------------------------------|------------|-----------|-----|
| Score         | Expect | Identities                                                     | Gaps       | Strand    |     |
| 372 bits(201) | 4e-107 | 418/517(81%)                                                   | 37/517(7%) | Plus/Plus |     |
| Query         | 2      | AATGGGGGATTGTTAGGGACTGGGGGAGAGGAATGGGGAGTTGGCGTCTAGTGGGGACAG   |            |           | 61  |
| Sbjct         | 93     | AAT-GGGGATTGTTAGGGACTGGGGGAGAGGAATGGGGAGTTGGCGTCTAGTGGGGACAG   |            |           | 151 |
| Query         | 62     | AGGTTCCATTTTGC GTTCATCTGGAGGTGGACGCACAGCATCGGGAATACACTTTGTGCC  |            |           | 121 |
| Sbjct         | 152    | AGGTTCCATTTTGC GTTCATCTGGAGGTGGACGCACAGCATCGGGAATACACAATGCCAC  |            |           | 211 |
| Query         | 122    | TGTGTTGTGTGTATCTCAATGTGGACACTGTGGCA ttttttttttttttGTGTAGACACGG |            |           | 181 |
| Sbjct         | 212    | TGAATTGTGT--ACTTCAACATGGTCACAATGGCACATTCTTTATTTTTGTAGAGACAG    |            |           | 269 |
| Query         | 182    | GGTGTCTGTGTTTTGCCACGATACCCTCAAAC TC--GTTCTCGCGCTCCTTCT-CCTCT   |            |           | 238 |
| Sbjct         | 270    | GGTGTCACTGTGTTGCCAGGCTAGCCTCGA ACTCGGGTTCAGGCTCTCCTTCCACCTCG   |            |           | 329 |
| Query         | 239    | CCCTCTCCCAAAGTGGT--GATTTTATGTGTGAGAC-CCACCACCTGTGCAAAA ttt-tg  |            |           | 294 |
| Sbjct         | 330    | GCCTC-CC-AAAGTGCTGGGATTATAGGTGTGAGCCACCAC-ACCTG-GCCAAATTTGTG   |            |           | 385 |
| Query         | 295    | ggtttttttgg ttttatat tttttGAAACACAGATTCTCCCTTGTGTACCTACGGTAGTG |            |           | 354 |
| Sbjct         | 386    | GGTTTTTGGTTTTTATGTTTTGAAACAGAGTTTCTCCCTTGT--CACCTAGGCTGGAG     |            |           | 443 |
| Query         | 355    | TACAG-GG-GCGATCTTGTGTACAGTGCCCTTTTACCTCG-GGGTCTCA--CGATACT     |            |           | 409 |
| Sbjct         | 444    | TACAGTGGCGGATCTTGGCTCAC--TGCAACCTTACCTCCTGGGT-TCAAGCGATTCT     |            |           | 500 |
| Query         | 410    | CTCGTGTCTCC-CCTCCCATGTA--TGGGATTACACGCGCACGTGCCAACACACCCA--T   |            |           | 464 |
| Sbjct         | 501    | C-C-TGCCTCAGCCTCCAAGTAGCTGGGATTACA-G-GCACCTGCCAACACACCCAGCT    |            |           | 556 |
| Query         | 465    | AATTTTT-CTATATTATAA TAGACA-GGG-TTTCACC                         |            |           | 498 |
| Sbjct         | 557    | AATTTTTTCTATTTT-TAGTAGAGACGGGGTTTCACC                          |            |           | 592 |

Deletion Mutation ↓

Insertion Mutation ↓

Substitution Mutation ↓

b)

| <b>Primer B</b> |        |                                                              |           |           |  |
|-----------------|--------|--------------------------------------------------------------|-----------|-----------|--|
| Score           | Expect | Identities                                                   | Gaps      | Strand    |  |
| 891 bits(482)   | 0.0    | 494/499(99%)                                                 | 3/499(0%) | Plus/Plus |  |
| Query           | 3      | CTGCTCTAG-AGAGCTCATGTTCCAGCAGGGACAGCTGACACCCAGGGGCCTGCACGGGG | 61        |           |  |
| Sbjct           | 46     | CTGCTCTAGAAGAGCTCATGTTCCAGCAGGGACAGCTAACACCCAGGGGCCTGCACGGGG | 105       |           |  |
| Query           | 62     | TGGAGGGCTCTTCAGAGGCAGGATCACCTCGGAGATGGGTGCAGGGGACCTCGGGCCACC | 121       |           |  |
| Sbjct           | 106    | TGGAGGGCTCTTCAGAGGCAGGATCACCTCGGAGATGGGTGCAGGGGACCTCGGGCCACC | 165       |           |  |
| Query           | 122    | CCAGGGCCAGGCCTGCTTGCCTGCTTAGGAGCTGGGTCTCCCACTCAGGGAGGGAGGGG  | 181       |           |  |
| Sbjct           | 166    | CCAGGGCCAGGCCTGCTTGCCTGCTTAGGAGCTGGGTCTCCCACTCAGGGAGGGAGGGG  | 225       |           |  |
| Query           | 182    | TCATGTCTCAAGGGCAGCCACTGGGCCTGAAAAGCAGAACCGCATGTGATCAGTCTGGGT | 241       |           |  |
| Sbjct           | 226    | TCATGTCTCAAGGGCAGCCACTGGGCCTGAAAAGCAGAACCGCATGTGATCAGTCTGGGT | 285       |           |  |
| Query           | 242    | GGGCAAGACTTCAAGAGAGCACGCTACCCTCAAGGGATGGAAGCAGAGGCTGGTAGCCG  | 301       |           |  |
| Sbjct           | 286    | GGGCAAGACTTCAAGAGAGCACGCTACCCTCAAGGGATGGAAGCAGAGGCTGGTAGCCG  | 345       |           |  |
| Query           | 302    | ACGTCCATGCCAGCCACCAACTCAGAGCCAGCACACTACCCGCATGTGCCTCTGCCAATG | 361       |           |  |
| Sbjct           | 346    | ACGTCCATGCCAGCCACCAACTCAGAGCCAGCACACTACCCGCATGTGCCTCTGCCAATG | 405       |           |  |
| Query           | 362    | AGTGGATGAAAAGCAGCGACCTACAGATGCAGGCAACCTGGATGAGTCTTGACTTTATCT | 421       |           |  |
| Sbjct           | 406    | AGTGGATGAAAAGCAGCGACCTACAGATGCAGGCAACCTGGATGAGTCTTGACTTTATCT | 465       |           |  |
| Query           | 422    | CACGGAGGGAAGGAAGCAGGCTCGGGAGGTGCCGTGCCGCGTGGCTCTGTTTATAAGCTG | 481       |           |  |
| Sbjct           | 466    | CACGGAGGGAAGGAAGCAGGCTCGGGAGGTGCCGTGCCGCGTGGCTCTGTTTATAAGCTG | 525       |           |  |
| Query           | 482    | TCTGGAAAAAAGGGCAAAA                                          | 500       |           |  |
| Sbjct           | 526    | TCTGGGAAAA-GG-CAAAA                                          | 542       |           |  |

Deletion Mutation ↓

Insertion Mutation ↓

Substitution Mutation ↓

**Figure S3: DNA sequencing for Autistic sample-6, a) Primer A and b) Primer B**

### **The sequence for primer A**

AATTGAGCCGGTCACAAAGGACACATTTTGTACTGTACAATTCCACTTGCATGAGGCACCTC  
AAGTAGTCAGATTCAAGAAACAGACAGGAGAATGGGGATTGTTAGGGACTGGGGGAGAG  
GAATGGGGAGTTGGCGTCTAGTGGGGACAGAGGTTCCATTTTGC GTTCATCTGGAGGTGG  
ACGCACAGCATCGGGAATACACAATGCCACTGAATTGTGTACTTCAACATGGTCACAATGG  
CACATTCTTTATTTTTTGTAGAGACAGGGTGTCACTGTGTTGCCAGGCTAGCCTCGAACTC  
GGTTTCAGGCTCTCCTTCCACCTCGGCCTCCCAAAGTGCTGGGATTATAGGTGTGAGCCACC  
ACACCTGGCCAAATTTGTGGGTTTTTTGGTTTTTATGTTTTTGAACAGAGTTTCTCCCTTGTC  
ACCTAGGCTGGAGTACAGTGGCGGATCTTGGCTCACTGCAACCTTTACCTCCTGGGTTCAA  
GCGATTCTCCTGCCTCAGCCTCCCAAGTAGCTGGGATTACAGGCACCTGCCAACACACCCAG  
CTAATTTTTTCTATTTTTAGTAGAGACGGGGTTTACCATGTTGGCCAGGCTGGTCTCGAACT  
CCTGACCTCAGGTGATCCGCCACCTCAGCCTCCCAAAGTGCTGGGATTACAGGAGTGAGG  
CGCTGCGCCCAGCCAAAATTTGTGTTTTTAAATGTATGTTTAAACAATTTAAAAATCCTAGATC  
ATCCACAGTTTGCAAAGCCACTGCTATCCATCTTGGAT

Forward Primer: AGGCACCTCAAGTAGTCAGA

Reverse Primer: TGCAAAGTGTGGATGATCTAGG

Product size: 702bp

### **The sequence for primer B**

AAAAGTGCCAAAGTGTCCATCCCATGAATGCAAGACACACAGTGCCTGCTCTAGAAGAGCT  
CATGTTCCAGCAGGGACAGCTAACACCCAGGGGCCTGCACGGGGTGGAGGGCTCTTCAGA  
GGCAGGATCACCTCGGAGATGGGTGCAGGGGACCTCGGGCCACCCAGGGCCAGGCCTGC  
TTGCCCTGCTTAGGAGCTGGGTCTCCCACTCAGGGAGGGAGGGTTCATGTCTCAAGGGCA  
GCCACTGGGCCTGAAAAGCAGAACCGCATGTGATCAGTCTGGGTGGGCAAGACTTCAAGA  
GAGCACGCCTACCCTCAAGGGATGGAAGCAGAGGCTGGTAGCCGACGTCCATGCCAGCCA  
CCAACTCAGAGCCAGCACACTACCCGCATGTGCCTCTGCCAATGAGTGGATGAAAAGCAGC  
GACCTACAGATGCAGGCAACCTGGATGAGTCTTGACTTTATCTCACGGAGGGAAGGAAGCA  
GGCTCGGGAGGTGCCGTGCCGCTGGCTCTGTTTATAAGCTGTCTGGGAAAAGGCAAAC  
CACAGTACAGAACACAG

Forward Primer: TGCCAAAGTGTCCATCCCAT

Reverse Primer: TTTGCCTTTTCCAGACAGC

Product size: 536bp

**Figure S4: Sequences for Primers A and B**
